# Supplementary material for: Identification of pro-inflammatory CD205+ macrophages in livers of hepatitis B virus transgenic mice and patients with chronic hepatitis B
Source: PubMed Central journal article supplement (PMC5402278; doi:10.1038/srep46765), 2017-04-24
Supplement: srep46765-s1.pdf [file srep46765-s1.pdf]

# **Identification of pro-inflammatory CD205<sup>+</sup> macrophages in livers of hepatitis B virus transgenic mice and patients with chronic hepatitis B**

Liang Yong<sup>1</sup>, Minmin Li<sup>1</sup>, Yimin Gao<sup>1</sup>, Yanru Deng<sup>2</sup>, Wenbin Liu<sup>3</sup>, Dake Huang<sup>4</sup>,  
Cuiping Ren<sup>1</sup>, Miao Liu<sup>1</sup>, Jijia Shen<sup>1</sup>, and Xin Hou<sup>1,5</sup>

<sup>1</sup>Anhui Provincial Laboratory of Microbiology and Parasitology; Department of Microbiology and Parasitology, Anhui Medical University, Hefei, China

<sup>2</sup>Intensive Care Unit, Affiliated Provincial Hospital of Anhui Medical University, Hefei, China

<sup>3</sup>Department of Hepatic Surgery and Anhui Province Key Laboratory of Hepatopancreatobiliary Surgery, Affiliated Provincial Hospital of Anhui Medical University, Hefei, China

<sup>4</sup>Integrated laboratory of College of Basic Medicine, Anhui Medical University, Hefei, China

<sup>5</sup>Department of Immunology, Anhui Medical University, Hefei, China

*Correspondence to:* Xin Hou, email: [houxin45@mail.ustc.edu.cn](mailto:houxin45@mail.ustc.edu.cn)

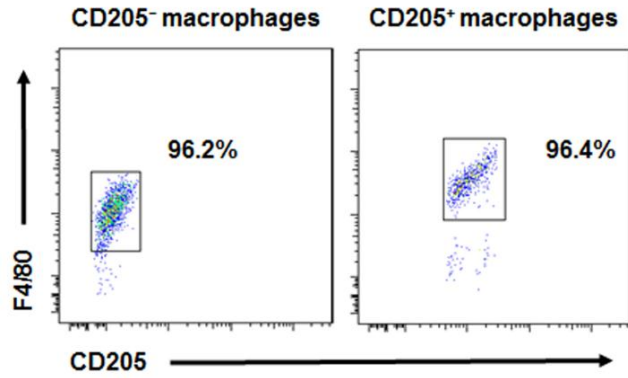

**Supplementary Figure S1.** The purity of hepatic CD205<sup>+</sup> and CD205<sup>-</sup> macrophages after sorting in HBs-Tg mice. Cells were gated on DAPI<sup>+</sup>CD45<sup>+</sup>CD11b<sup>+</sup>F4/80<sup>+</sup> macrophages and analysed the expression of CD205.

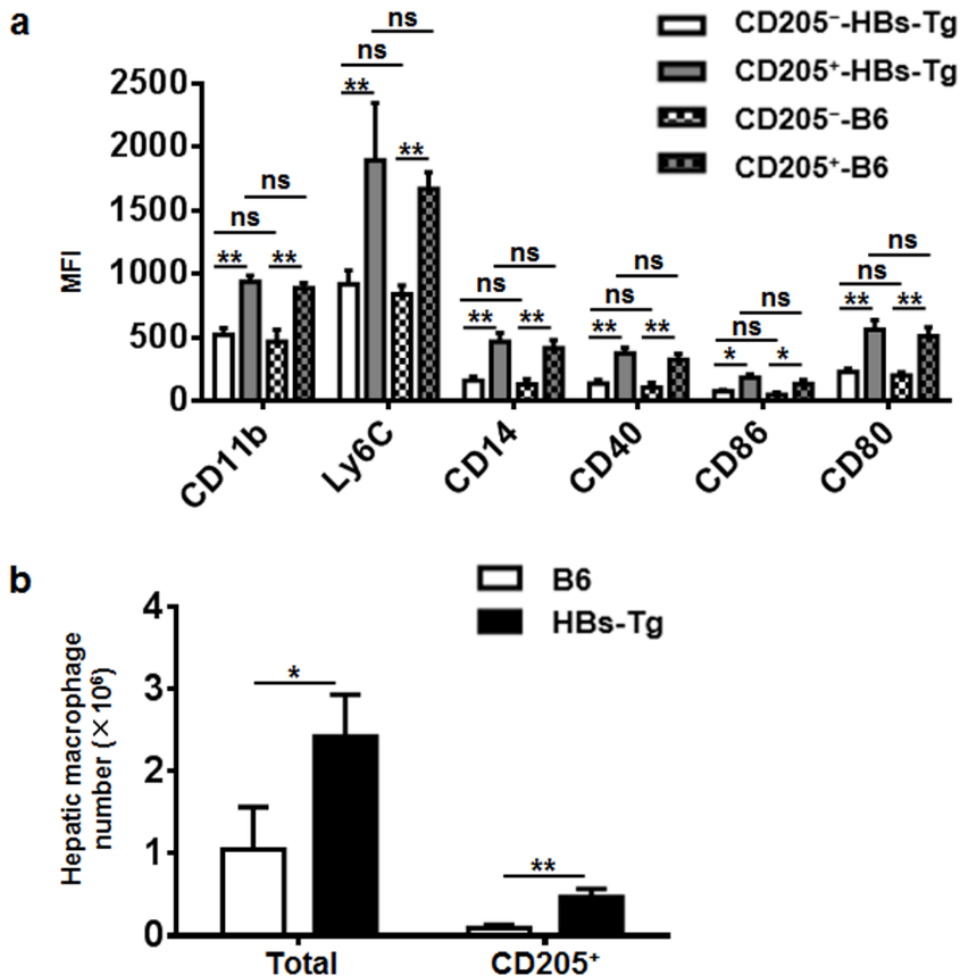

**Supplementary Figure S2.** Expression of activation makers on hepatic macrophages and hepatic macrophage number in HBs-Tg and B6 mice. (a)

Expression of CD11b, Ly6C, CD14, CD40, CD80, and CD86 on hepatic CD205<sup>+/-</sup> macrophages in HBs-Tg (n = 4) and B6 (n = 4) mice. Data are expressed as mean  $\pm$ SD.

\* $p < 0.05$ , \*\* $p < 0.01$ , ns, not significant, one-way ANOVA with Bonferroni's post-test.

**(b)** Cell numbers of total hepatic macrophages and CD205<sup>+</sup> macrophages in HBs-Tg (n = 4) and B6 (n = 4) mice. Data are expressed as mean  $\pm$ SD. \* $p < 0.05$ , \*\* $p < 0.01$ , two-tailed unpaired Student's *t*-test.
